# Supplementary material
Source: ML conference proceedings conference paper supplement (https://proceedings.mlr.press/v89/atan19a.html)
Supplement: Supplementary file [file atan19a-supp.pdf]

# 1 Supplementary Material

## 1.1 Proof of Proposition 1

Fix a particular subgroup  $x$ . If the subgroup  $x$  is in the estimated positive set, then total expected error for subgroup  $x$  is given by  $\lambda P_x(s)$ . Similarly, if the subgroup  $x$  is in the estimated negative set, then total expected error for subgroup  $x$  is given by  $(1 - \lambda)(1 - P_x(s))$ . When  $P_x(s) \geq 1 - \lambda$ , it holds that  $\lambda P_x(s) \geq (1 - \lambda)(1 - P_x(s))$ . In that case,  $x \in H_{est}^+$  minimizes the total expected posterior error.

## 1.2 Additional experiments

**Type 1 and Type 2 errors** Figure 1.2 illustrates the trade-off between type-I and type-II errors for the RCT-KG algorithm (100 patients in each of 10 cohorts.) Of course, as  $\lambda$  increases, the type-I error decreases and the type-II error increases.

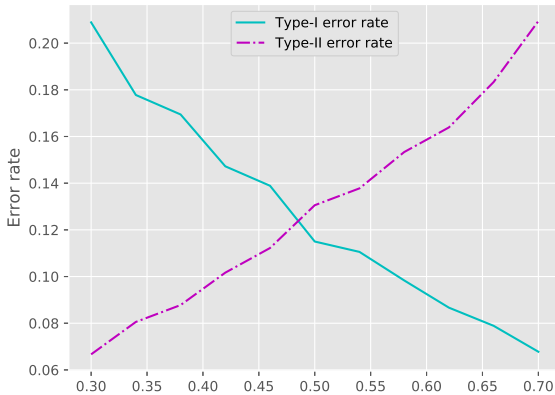

Figure 1: Tradeoffs between Type-I and Type-II errors

**Informative Prior** Finally, we present an experiment to illustrate the effect of having informative priors. We generated informative priors by sampling 50 patients from each subgroup and treatment group (but we did not count these patients as part of the total patient budget, which was either 500 or 1000). As seen from Table 1, having an informative prior increases the amount by which RCT-KG improves over UA. Having an informative prior is useful because it allows RCT-KG to make more informed decisions in the earlier

stages and in particular to focus more on subgroups for which the difference between the true effectiveness of the treatment and control is smaller.

| Budget                 | 500    | 1000   |
|------------------------|--------|--------|
| Non-informative        | 0.1151 | 0.2813 |
| Informative for sg 0,3 | 0.2000 | 0.3703 |
| Informative for sg 1,2 | 0.1323 | 0.2878 |

Table 1: Improvement score for different budgets
